# Supplementary material for: Efficient solution-processable deep-red hot exciton emitters based on thiadiazole[3,4-c]pyridine for a simple electroluminescent device
Source: Royal Society of Chemistry journal article supplement (doi:10.1039/d3nj04281b), 2023-01-01

## Supporting Information

### Efficient solution-processable deep-red hot exciton emitter based on thiadiazole[3,4-c]pyridine for a simple electroluminescent device

Patteera Funchien,<sup>a</sup> Nuttapon Chantanop,<sup>a</sup> Pongsakorn Chasing,<sup>a</sup> Taweesak Sudyoadsuk<sup>b</sup> and Vinich Promarak<sup>a\*</sup>

<sup>a</sup>Department of Materials Science and Engineering, School of Molecular Science and Engineering, Vidyasirimedhi Institute of Science and Technology, Wangchan, Rayong 21210, Thailand. E-mail: [vinich.p@vistec.ac.th](mailto:vinich.p@vistec.ac.th)

<sup>b</sup>Frontier Research Center (FRC), Vidyasirimedhi Institute of Science and Technology, Wangchan, Rayong 21210, Thailand.

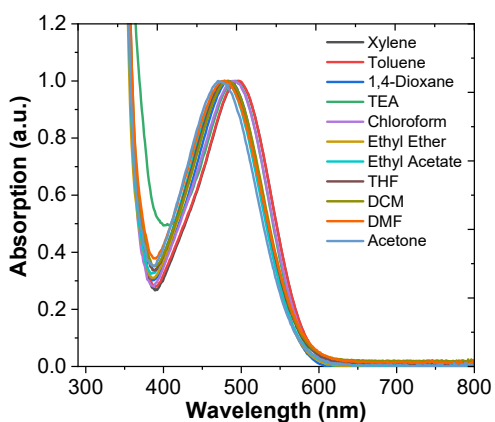

Fig. S1 Normalized UV-Vis absorption spectra in different solvents

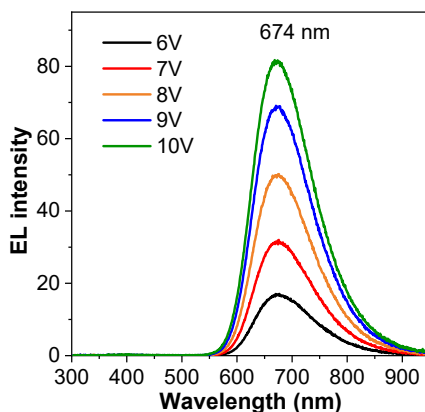

Fig. S2 EL spectra of the OLED under different applied voltages

**Table S1** Excited states energy calculated by TD-DFT B3LYP/6-31G(d,p)

| State | Energy (eV) | Osc. Strength ( <i>f</i> ) | Transition character |
|-------|-------------|----------------------------|----------------------|
| S1    | 1.25        | 0.0006                     | CT                   |
| S2    | 1.27        | 0.0001                     | CT                   |
| S3    | 1.35        | 0.0001                     | CT                   |
| S4    | 1.48        | 0.0000                     | CT                   |
| S5    | 1.72        | 0.0000                     | CT                   |
| T1    | 0.28        | -                          | LE+CT                |
| T2    | 1.36        | -                          | CT                   |
| T3    | 1.44        | -                          | LE+CT                |
| T4    | 1.51        | -                          | CT                   |
| T5    | 1.55        | -                          | CT                   |

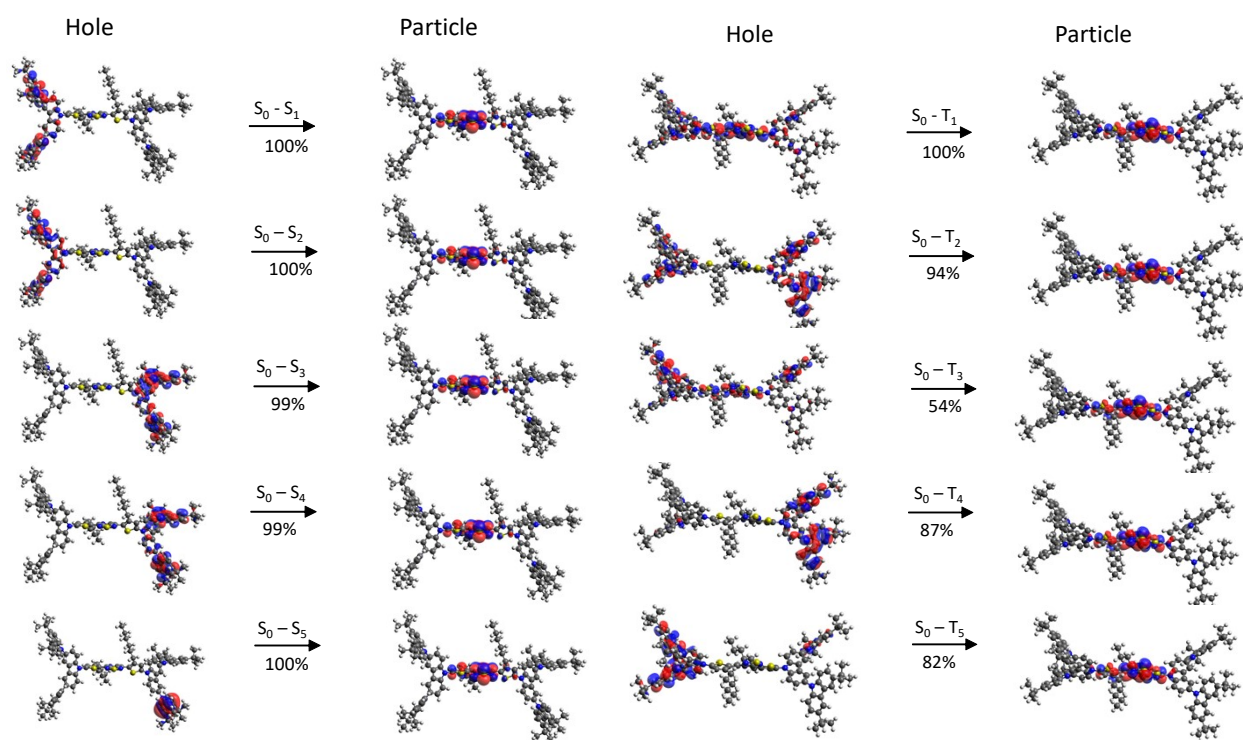

**Fig. S3** Copies of NMR and HRMS mass spectra

Fig. S4 Copies of NMR and HRMS mass spectra

Compound 2

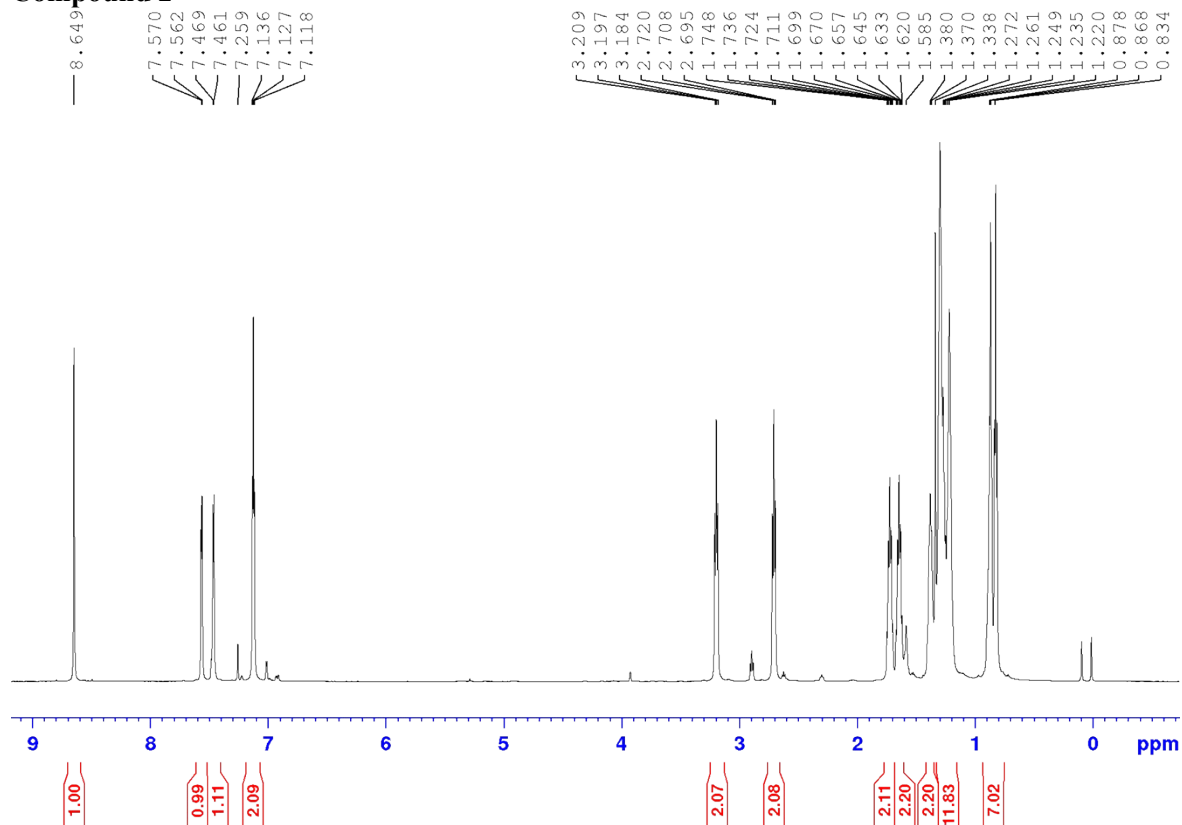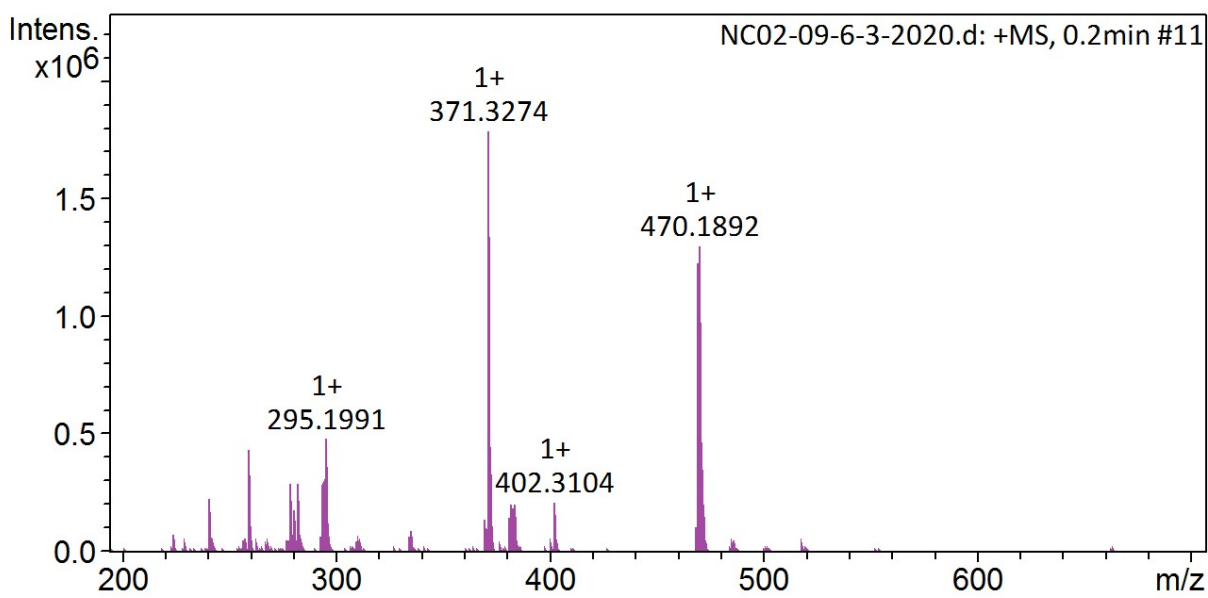

# Compound 3

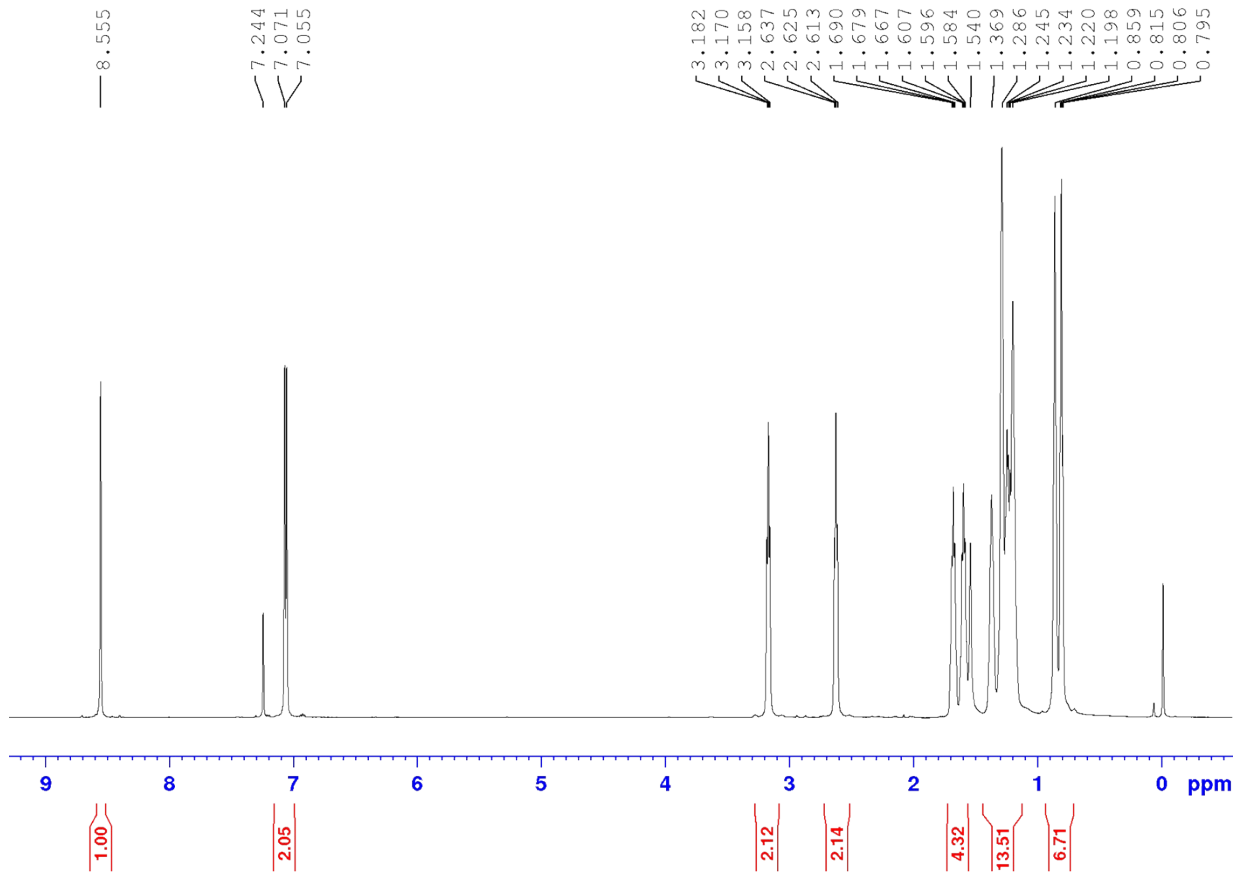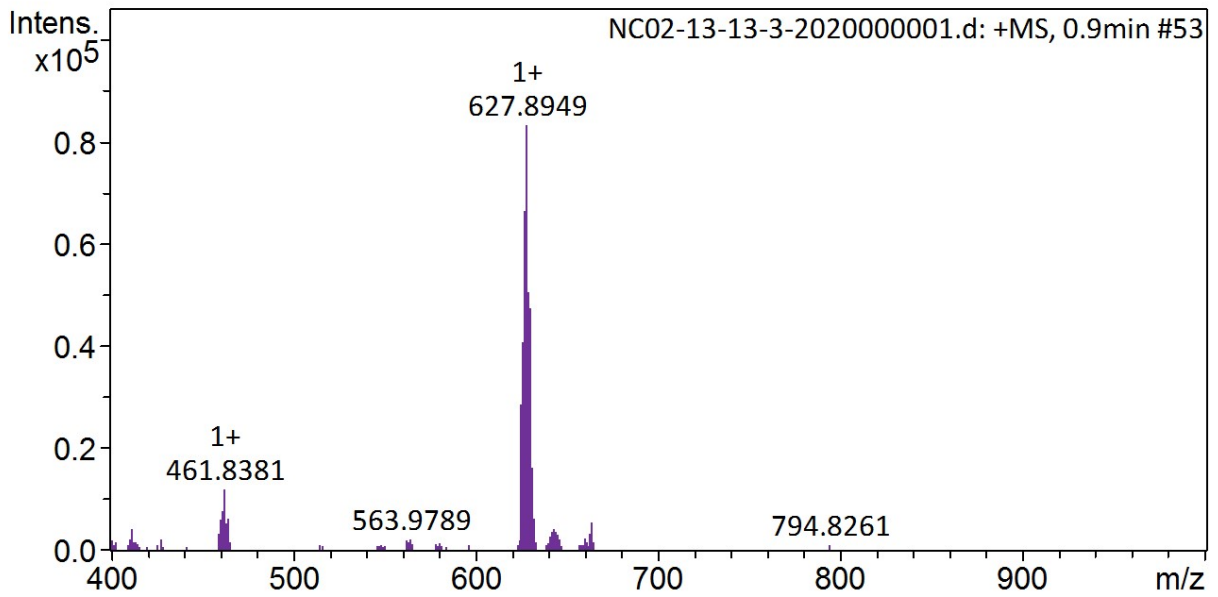

# CCTPy

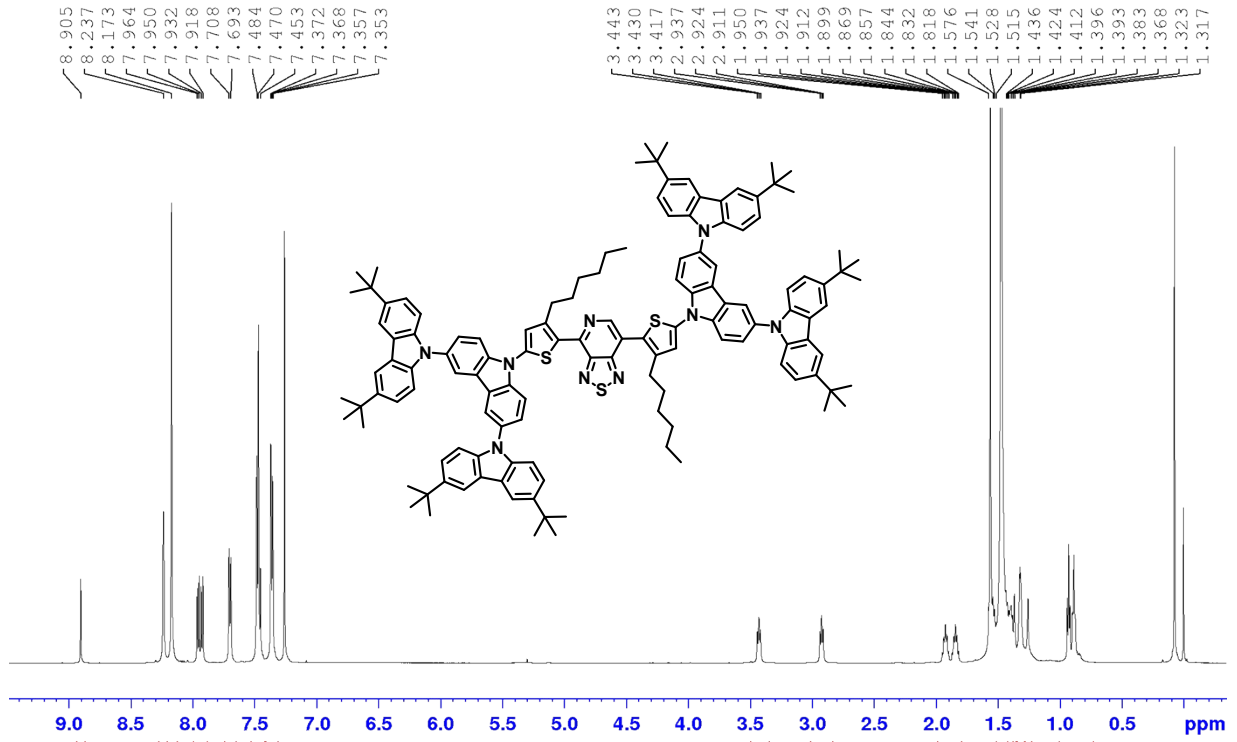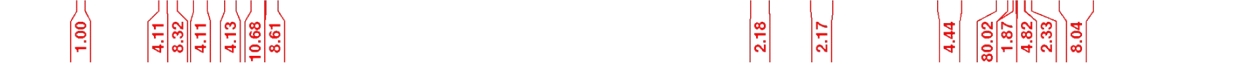

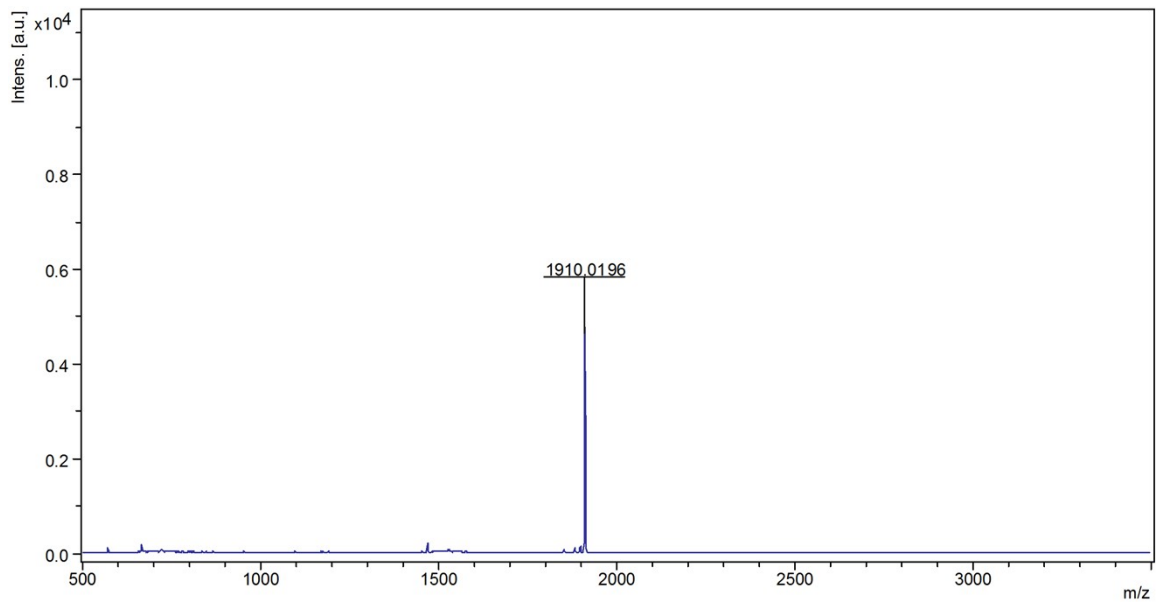

Supplement: d3nj04281b1.pdf [file d3nj04281b1.pdf]
